# Supplementary material
Source: PubMed Central journal article supplement (PMC4471993)
Supplement: NIHMS696859-supplement-Supplement1.pdf [file NIHMS696859-supplement-Supplement1.pdf]

## Supplementary Appendix

This appendix has been provided by the authors to give readers additional information about their work.

Supplement to: Halpern SD, French B, Small DS, et al. Randomized trial of four financial-incentive programs for smoking cessation. *N Engl J Med* 2015;372:2108-17. DOI: 10.1056/NEJMoa1414293

## SUPPLEMENTARY APPENDIX

### A Randomized Trial of Four Financial Incentive Programs for Smoking Cessation

Scott D. Halpern, M.D., Ph.D.<sup>1,2,3,4</sup>

Benjamin French, Ph.D.<sup>2,3</sup>

Dylan S. Small, Ph.D.<sup>2,6</sup>

Kathryn Saulsgiver, Ph.D.<sup>2,3</sup>

Michael O. Harhay, M.P.H.<sup>3</sup>

Janet Audrain-McGovern, Ph.D.<sup>2,7</sup>

George Loewenstein, Ph.D.<sup>2,8</sup>

Troyen A. Brennan, M.D., J.D.<sup>9</sup>

David A. Asch, M.D., M.B.A.<sup>1,2,5,10,11</sup>

Kevin G. Volpp, M.D., Ph.D.<sup>1,2,4,5,10,11</sup>

#### AUTHOR AFFILIATIONS

<sup>1</sup>Department of Medicine, <sup>2</sup>Center for Health Incentives and Behavioral Economics at the Leonard Davis Institute of Health Economics, <sup>3</sup>Department of Biostatistics and Epidemiology, <sup>4</sup>Department of Medical Ethics and Health Policy, and <sup>7</sup>Department of Psychiatry, Perelman School of Medicine at the University of Pennsylvania; <sup>5</sup>Center for Health Care Innovation, University of Pennsylvania Health System; <sup>6</sup>Department of Statistics and <sup>10</sup>Department of Health Care Management, Wharton School, University of Pennsylvania; <sup>8</sup>Center for Behavioral Decision Research, Carnegie Mellon University; <sup>9</sup>CVS/Caremark; <sup>11</sup>Center for Health Equity Research and Promotion, Philadelphia VA Medical Center

## SUPPLEMENTARY APPENDIX

### Table of Contents

**Supplemental Methods:** A. Estimation of the Complier Average Treatment Effect; B. Details of the power calculation.

**Figure S1:** Timing of recruitment strategies for CVS/Caremark employees and their friends and family members

**Figure S2:** Schematics of the incentive programs

**Figure S3:** Costs per participant who successfully quits in each incentive arm

**Table S1:** Observed incentive payouts to participants in the four incentive arms

**Table S2:** Effectiveness of the four incentive programs versus usual care in producing sustained abstinence at 14 days, 30 days, 6 months and 12 months

**Table S3:** Self-reported versus biochemically verified abstinence at 14 days, 30 days, 6 months and 12 months

**Table S4:** Effectiveness of reward-based versus deposit-based incentives in producing sustained abstinence at 14 days, 30 days, 6 months and 12 months

**Table S5:** Effectiveness of individual-based versus group-based incentives in producing sustained abstinence at 14 days, 30 days, 6 months and 12 months

**Table S6:** Proportions of participants achieving sustained abstinence through 6 months by intervention arm and randomization stratum  
**Table S7:** Efficacy of reward-based and deposit-based incentives conditional on acceptance of the assigned intervention (i.e., per-protocol analysis).

**Table S8:** Results of screening for smoking status at trial enrollment across arms

**Table S9:** Sensitivity analysis of sustained abstinence at 6 months to account for potential enrollment of non-smokers

**Table S10:** Self-reported abstinence and verified abstinence rates at 14 days, 30 days, 6 months and 12 months across participants as assigned (ITT)

## Supplemental Methods:

### A. Estimation of the Complier Average Treatment Effect

This section provides a walkthrough of the complier-average treatment effect using instrumental variables (IVs) to estimate efficacy for this study.

#### Introduction

In a randomized clinical trial (RCT), there are traditionally two types of analyses (Figure): intention-to-treat (ITT) and per-protocol (PP) analyses. The ITT analysis is used to assess the effect of an intervention among all those who are initially randomized to each study arm (Figure, diagram A). However, randomization does not necessarily indicate acceptance of the assigned intervention or compliance with the treatment. Therefore, PP or as-treated analyses are commonly employed to quantify the treatment effect among those who accept or adhere to their assigned intervention (Figure, diagram B).

The ITT analysis quantifies the effectiveness of an intervention among those randomly assigned to receive it. The PP assesses the efficacy of an intervention among those who chose to accept or adhere to it. This RCT was designed to assess acceptance, efficacy, and effectiveness. As a consequence, participants initially randomized to an intervention arm could choose to accept or not accept their assigned intervention. Traditional PP analyses are often biased because they do not account for post-randomization selection phenomena, such as the possibility that participants who accept or reject their initial arm differ with regard to their underlying propensities to have favorable outcomes.

In this trial we integrate instrumental variable (IV) and principal stratification methods to overcome the biases typically associated with PP analyses (Figure 1, diagram C). The following sections explain how this method works, and describe the calculations of the estimated treatment effects. The IV analysis in this RCT is estimated using the randomization arm (i.e., initial treatment assignment) as the instrument. As a result, the estimated treatment effect of each intervention on smoking cessation is adjusted for the percentage of assigned patients who accepted the treatment arm. This approach differs from a PP analysis, having the key advantage that the IV approach uses the data on all randomized patients, rather than merely those who accept the assigned intervention, and then adjusts for acceptance, thereby attenuating the selection effects.

### Methods to quantify treatment effects in an RCT of interventions to improve smoking cessation

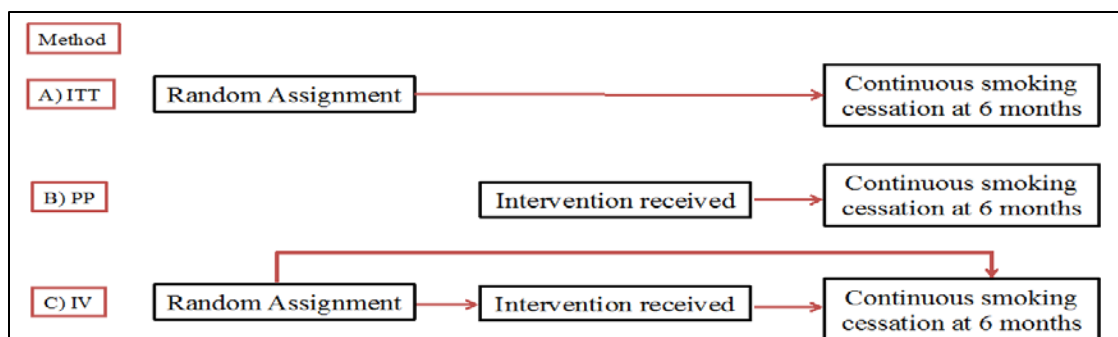

Adapted from Sussman & Hayward.<sup>1</sup>

**Illustration in current RCT**

For illustration, we will use the primary outcome, sustained smoking abstinence through 6 months (coded as 1 if continuous smoking abstinence, and 0 if not). This analysis requires the integration of the acceptance results to help attenuate the potential selection biases associated with successful cessation among those who accept their initial randomization arm compared to those that do not.

UC=Usual care, IR=Individual rewards, CR= Collaborative Reward, ID=Individual Deposit, CD=Competitive deposit

We begin with the initial results.\*

|             |                                 |                                 |                     |                     | <i>ITT</i>    |                    | <i>PP</i>     |
|-------------|---------------------------------|---------------------------------|---------------------|---------------------|---------------|--------------------|---------------|
| <b>Arms</b> | <b>Initially randomized (n)</b> | <b>Accepted initial arm (n)</b> | <b>% acceptance</b> | <b>n quit (ITT)</b> | <b>% quit</b> | <b>n quit (PP)</b> | <b>% quit</b> |
| UC          | 468                             | 468                             | -                   | 28                  | 6.0%          | 28                 | 6.0%          |
| IR          | 498                             | 472                             | 94.8%               | 76                  | 15.3%         | 76                 | 16.1%         |
| CR          | 519                             | 442                             | 85.2%               | 83                  | 16.0%         | 80                 | 18.1%         |
| ID          | 582                             | 75                              | 12.9%               | 56                  | 9.6%          | 39                 | 52.0%         |
| CD          | 471                             | 71                              | 15.1%               | 52                  | 11.0%         | 39                 | 54.9%         |

Due to the similarities in results between the individual and collaborative reward arms and in results between the individual and competitive deposit arms, results were collapsed within the reward and deposit arms separately. Thus, the following data are used.\*

|             |                                 |                                 |                     |                     | <i>ITT</i>    |                    | <i>PP</i>     |
|-------------|---------------------------------|---------------------------------|---------------------|---------------------|---------------|--------------------|---------------|
| <b>Arms</b> | <b>Initially randomized (n)</b> | <b>Accepted initial arm (n)</b> | <b>% acceptance</b> | <b>n quit (ITT)</b> | <b>% quit</b> | <b>n quit (PP)</b> | <b>% quit</b> |
| UC          | 468                             | 468                             | -                   | 28                  | 6.0%          | 28                 | 6.0%          |
| Rewards     | 1017                            | 914                             | 89.9%               | 159                 | 15.6%         | 156                | 17.1%         |
| Deposits    | 1053                            | 146                             | 13.9%               | 108                 | 10.3%         | 78                 | 53.4%         |

UC=Usual care; \*note that the percentages reported in this Table are the raw percentages, whereas the percentages reported in the main manuscript are adjusted for the two variables used to stratify the randomization, as is recommended in manuscript reference 30.

This analysis assumes that all participants who would accept deposits if assigned to receive deposits would also accept rewards if assigned to receive rewards, thereby creating three compliance classes or principal strata of subjects.<sup>2,3</sup>

$C_i = 000$  , subject  $i$  would not accept either rewards or deposit

$C_i = 0R0$  , subject  $i$  would accept rewards but not deposit

$C_i = 0RD$  , subject  $i$  would accept both rewards and deposit

Each subject has three potential outcomes that are listed below. Only one of the potential outcomes can be observed, the outcome corresponding to the actual treatment the subject received.

$Y_i^0$  = whether subject  $i$  would stop smoking if taking control

$Y_i^R$  = whether subject  $i$  would stop smoking if taking rewards

$Y_i^D$  = whether subject  $i$  would stop smoking if taking deposit

Our analysis assumes the exclusion restriction that a subject's potential outcome depends only on the treatment received. In other words, the treatment assignment only influences the potential outcome through the treatment received.<sup>4</sup>

To understand the composition of the groups being compared in estimating these values, we provide the below table. Following the table, we provide the calculations used to estimate the rates for each compliance class. Because this study was randomized we can assume that the rates will be constant across arms, therefore allowing us to infer values in compliance classes that are not directly observed. The study design initially offers each participant entrance to an intervention arm or usual care. The participants can accept or reject the intervention arm, thereby creating a potential bias in comparisons between those who accept versus those who do not. Thus, the composition of each arm can be separated into the

three classes mentioned above and displayed in tabular form below. We provide the calculations for the proportions below the table based on the summary tables above.

| Initial Arm | Strata / compliance class | Proportion of sample |
|-------------|---------------------------|----------------------|
| UC          | 000                       | .101                 |
| UC          | OR0                       | .760                 |
| UC          | ORD                       | .139                 |
| Reward      | 000                       | .101                 |
| Reward      | OR0                       | .760                 |
| Reward      | ORD                       | .139                 |
| Deposit     | 000                       | .101                 |
| Deposit     | OR0                       | .760                 |
| Deposit     | ORD                       | .139                 |

Note:  $.101 + .139 + .760 = 100\%$  of all patients.

We use the following notation:

Z = Initial intervention arm

A = Treatment taken

1. To estimate the proportion of non-accepters (who receive usual care in this trial) in the reward arms we calculate:

$$1 - ((472+442)/(498+519)) = .101, 10.1\%$$

In notation:  $P(000) = P(A=UC | Z=R)$

2. To estimate the proportion that would accept either a reward or deposit intervention we calculate:

$$(75+71)/(582+471) = .139, 13.9\%$$

In notation:  $P(ORD) = P(A=D | Z=D)$

3. To estimate the proportion that would accept rewards but not deposits we calculate:

$$1 - 0.101 - 0.139 = .76, 76\%$$

In notation:  $P(OR0) = 1 - [P(000)+P(ORD)]$

With these proportions we can now perform three treatment effect estimates using the weighted averages of these proportions and the observed outcomes using IV techniques.

The analysis was performed using R 3.0.2. The code for this analysis is available upon request.

### Estimations

**Using this framework for our study, the following estimates were calculated:**

#### **Estimate 1:**

Effect of rewards vs. usual care for subjects who would accept rewards if offered them ( $C_i = OR0$  or  $C_i = ORD$ ): 0.107 (95% CI: 0.068, 0.147). This value, presented as a risk difference, is calculated using a weighted average of the usual care outcomes in OR0 & ORD compared to the rewards strata with the usual care arm as the reference category.

$$\frac{\hat{P}(Y=1 | Z=R) - \hat{P}(Y=1 | Z=UC)}{\hat{P}(A=R | Z=R) - \hat{P}(A=R | Z=UC)} = \frac{\hat{P}(Y=1 | Z=R) - \hat{P}(Y=1 | Z=UC)}{\hat{P}(A=R | Z=R)}$$

#### **Estimate 2:**

Effect of deposit vs. usual care for subjects who would accept deposits if offered them ( $C_i = 0RD$ ): 0.308 (95% CI: 0.110, 0.506). This value, presented as a risk difference, is calculated using the usual care outcomes in 0RD compared with outcomes of ORD in the deposit arms.

$$\frac{\hat{P}(Y = 1 | Z = D) - \hat{P}(Y = 1 | Z = UC)}{\hat{P}(A = D | Z = D) - \hat{P}(A = D | Z = UC)} = \frac{\hat{P}(Y = 1 | Z = D) - \hat{P}(Y = 1 | Z = UC)}{\hat{P}(A = D | Z = D)}$$

### Estimate 3:

The final estimate(s) compare the deposit arm to the reward arm in the ORD class

**This comparison is not identified without making an assumption about the following parameter:**

$e^\beta$  = given that a subject is either  $C = 0RD$  or  $0R0$ ,  
odds ratio of being  $C = 0RD$  for  $Y^R = 1$  vs.  $Y^R = 0$

$e^\beta$  therefore reflects the intrinsic difference in underlying probability of quitting among people who would accept deposits (or rewards) vs. people who would accept only rewards. A related measure of this relative quit potential which is identified as:

$e^\gamma$  = given that a subject is either  $C = 0RD$  or  $0R0$ , the odds ratio of being  $C = 0RD$  for  $Y^0 = 1$  vs.  $Y^0 = 0$ .

$e^\gamma$  can be estimated as follows. The right hand side of the following three equations can be estimated:

$$P(Y^0 = 1 | C = 000) = P(Y = 1 | Z = R, A = UC)$$

$$P(Y^0 = 1 | C = 000 \text{ or } 0R0) = P(Y = 1 | Z = D, A = UC)$$

$$P(Y^0 = 1) = P(Y = 1 | Z = UC, A = UC)$$

The left hand side of the three equations can be written as functions of

$$P(Y^0 = 1 | C = 000), P(Y^0 = 1 | C = 0R0), P(Y^0 = 1 | C = 0RD) \text{ and}$$

$$P(C = 000), P(C = 0R0), P(C = 0RD) .$$
 We have presented estimates of

$P(C = 000), P(C = 0R0), P(C = 0RD)$  above. Consequently, the three equations in the three unknowns  $P(Y^0 = 1 | C = 000), P(Y^0 = 1 | C = 0R0), P(Y^0 = 1 | C = 0RD)$  can be solved and an estimate of  $e^\gamma$ , which is a function of

$$P(Y^0 = 1 | C = 0R0), P(Y^0 = 1 | C = 0RD), P(C = 0R0), P(C = 0RD) \text{ can be formed.}$$

$e^\beta$  and  $e^\gamma$  both refer to the odds ratio of being  $C=0RD$  vs.  $C=0R0$  among those who cease smoking under a certain arm ( $e^\beta$  considers smoking cessation under the rewards arm and  $e^\gamma$  considers smoking



cessation under the usual care assumption). We make the assumption that  $e^\beta = e^\gamma$  which is equivalent to a claim that the odds ratio effect of rewards vs. usual care on smoking cessation is the same for people who would accept deposits as for those people who would accept rewards only. This assumption of proportional odds is similar to that made in any logistic regression model that does not include an interaction between the treatment and the covariates. We report results for  $e^\beta$  at three values: the point estimate of  $e^\gamma$ , the upper 95% confidence limit of  $e^\gamma$ , and the lower 95% confidence limit of  $e^\gamma$ . The outcome remains continuous abstinence through 6 months. Given that a subject is either  $C = 0RD$  or  $0R0$ , the odds ratio of being  $C = 0RD$  for  $Y^0 = 1$  vs.  $Y^0 = 0$  is estimated to be 9.36 with a 95% confidence interval of (2.71, 23.12).

| $e^\beta$ | $E(Y_i^D - Y_i^R   C_i = 0RD)$<br>(effect of deposits vs. rewards for rewards+deposit compliers) |
|-----------|--------------------------------------------------------------------------------------------------|
| 2.71      | 0.258 (0.162, 0.348)                                                                             |
| 9.36      | 0.132 (0.031, 0.228)                                                                             |
| 23.12     | 0.064 (-0.057, 0.174)                                                                            |

We also find that the largest  $e^\beta$  at which the 95% confidence interval for  $E(Y_i^D - Y_i^R | C_i = 0RD)$  is entirely positive is 12.5. This value is identified by searching over a grid of  $e^\beta$  with step size .5. This value also helps to define the sensitivity of our key conclusion to the assumption that  $e^\beta = e^\gamma$ . Our base estimate of the superiority of deposits vs. rewards among participants who would accept either is predicated on the most likely scenario, in which  $e^\beta = e^\gamma$ . However, the foregoing calculation shows that the effect remains statistically significant across a broad range of estimates of  $e^\beta$ , namely as long as  $e^\beta$  is less than  $(12.5/9.36) * e^\gamma = 1.34 * e^\gamma$  (assuming that  $\gamma$  is equal to its point estimate). Thus, even if the odds ratio effect of rewards vs. usual care is different among participants who would accept deposits or rewards vs. participants who would accept only rewards, as long as the odds ratio effect among the former does not exceed 134% of the effect among the latter, the result still holds that the deposit arm is significantly better than the reward arm for participants who would accept either.

## B. Details of the power calculation and main protocol modification

We estimated that enrolling 2,185 participants – 437 in each of the 5 arms – would provide 80% power to detect absolute differences of at least 7.5 percentage points in sustained abstinence rates between any one of the novel incentive programs versus the individual reward program previously shown to achieve a 6-month sustained abstinence rate of 14.7%.<sup>1</sup> This calculation was based on two-sided significance testing, adjustment for multiple comparisons using the stepwise Hochberg method where the initial test is at  $\alpha = 0.05$  and subsequent tests are at progressively lower  $\alpha$  levels, and an allowance

for sample size imbalance across arms of up to 10%. This sample size would also provide > 90% power to detect each incentive's effectiveness compared with usual care (estimated success rate of 5%<sup>1</sup>) and > 80% power to detect differences in acceptance of at least 7.5 percentage points less than acceptance of the individual reward arm, assuming the latter had at least 90% acceptance.

The adaptive randomization protocol enabled early detection of unexpectedly large differences in the interventions' acceptance. With authorization from the Data and Safety Monitoring Board, we implemented caps on the randomization probabilities to the less acceptable arms, while preserving random assignment to all arms. This preserved the ability to enroll the target number of 437 accepting participants in the more acceptable arms (see **Online Protocol**).

### References

1. Sussman, J.B and Hayward, R.A. (2009). An IV for the RCT: using instrumental variables to adjust for treatment contamination in randomized controlled trials. *British Medical Journal*, 340, 1181-84.
2. Frangakis, C.E. and Rubin, D.B. (2002). Principal stratification in causal inference. *Biometrics*, 58, 21-29.
3. Cheng, J. and Small, D.S. (2006). Bounds on causal effects in three-arm trials with noncompliance. *Journal of the Royal Statistical Society, Series B*, 68, 815-836.
4. Angrist, J., Imbens G, Rubin D. Identification of Causal Effects Using Instrumental Variables. *Journal of the American Statistical Association* 1996; 91:444-55.

**Figure S1: Timing of recruitment strategies for CVS/Caremark employees and their friends and family members**

| Date                              |                                                                                   | Recruitment Strategies                                      |                                                 |                                                    |                                                               |
|-----------------------------------|-----------------------------------------------------------------------------------|-------------------------------------------------------------|-------------------------------------------------|----------------------------------------------------|---------------------------------------------------------------|
| <b>Week 1</b><br><b>2/20/2012</b> | On-site information tables for smoke-free campus announcement                     | Email to Human Resources                                    | Human Resource Presentations                    |                                                    |                                                               |
| <b>Week 2</b><br><b>2/27/2012</b> | Email to cooperate employees                                                      | Inclusion in monthly benefits orientation                   | Email to employees enrolled in wellness program | Posted on employee health care centered website    | Posted in web based employee newsletter (full-time employees) |
| <b>Week 3</b><br><b>3/5/2012</b>  | Posted in new hire section of web based employee newsletter (full-time employees) | Email to store managers                                     | Paycheck message                                | Posted on TV Plasma Screens at corporate locations | Posting made through web based employee resources             |
| <b>Week 4</b><br><b>3/12/2012</b> | Email to wellness advocates                                                       | Posters placed in stores                                    |                                                 |                                                    |                                                               |
| <b>Week 5</b><br><b>3/19/2012</b> | Postcards sent to all employees                                                   | Feature story in employee newsletter (all employees)        |                                                 |                                                    |                                                               |
| <b>Week 6</b><br><b>3/26/2012</b> | Phone message from Chief Medical Officer                                          |                                                             |                                                 |                                                    |                                                               |
| <b>Week 7</b><br><b>4/2/2012</b>  | Email to cooperate employees                                                      | Flyers and information tables at Benefit Fairs (April 2012) |                                                 |                                                    |                                                               |
| <b>Weeks 8+</b>                   | Posted on company wellness partners website (6/1/12)                              | Second postcard sent to employees (9/7/12)                  |                                                 |                                                    |                                                               |

Figure S2: Schematics of the incentive programs

A. All trial arms

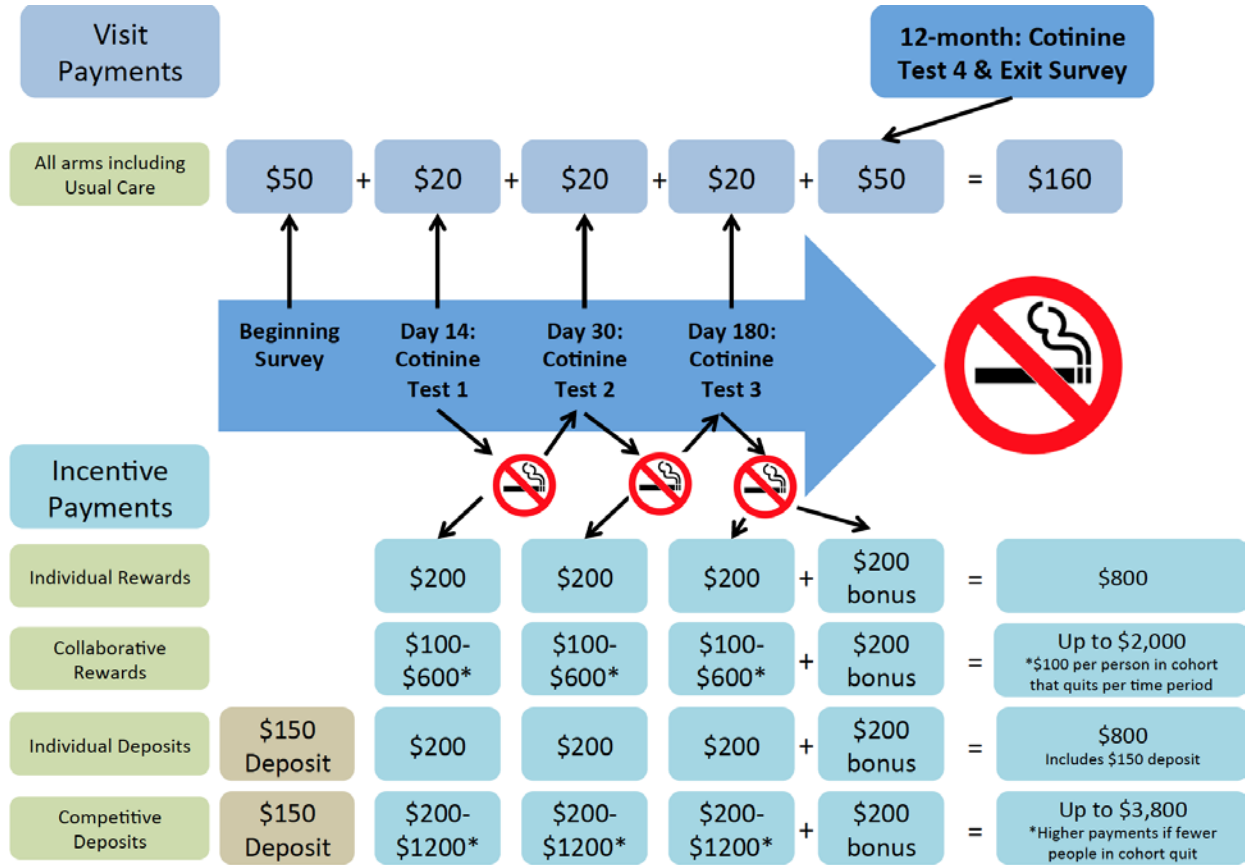

**B. Collaborative rewards arm in greater detail**

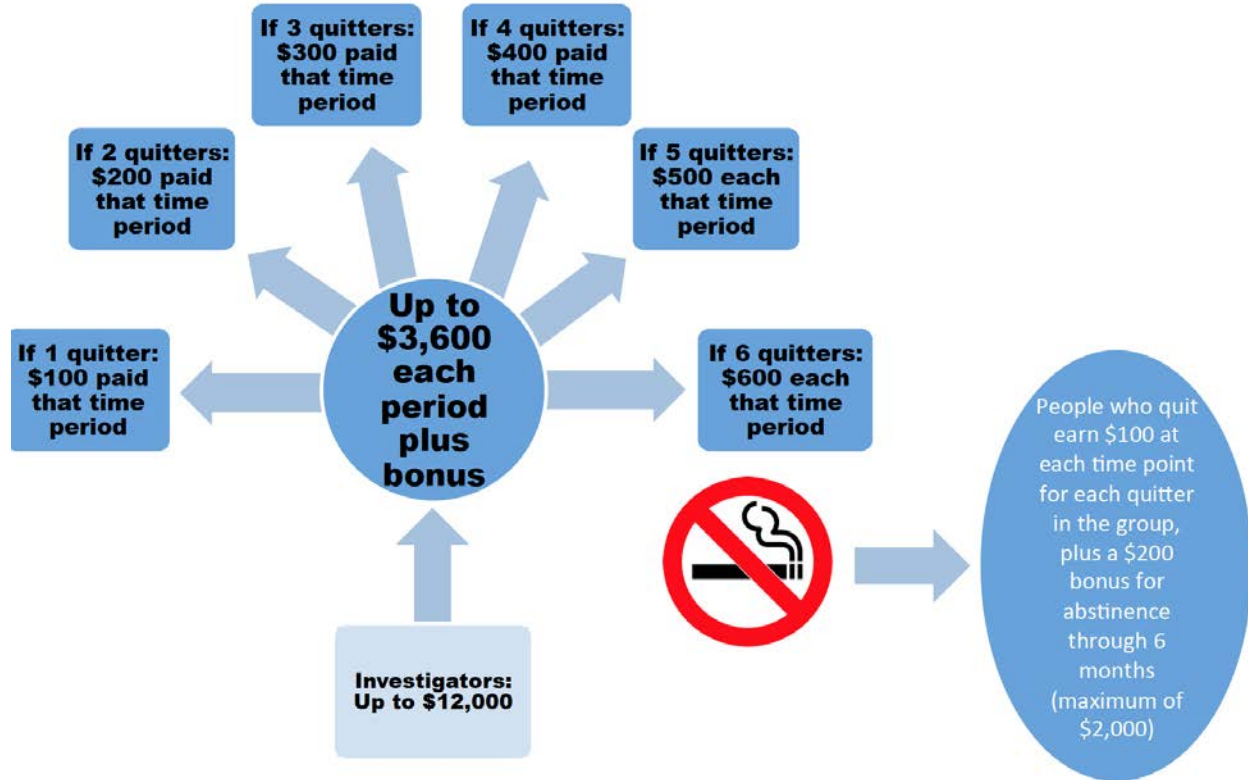

**C. Competitive deposits arm in greater detail**

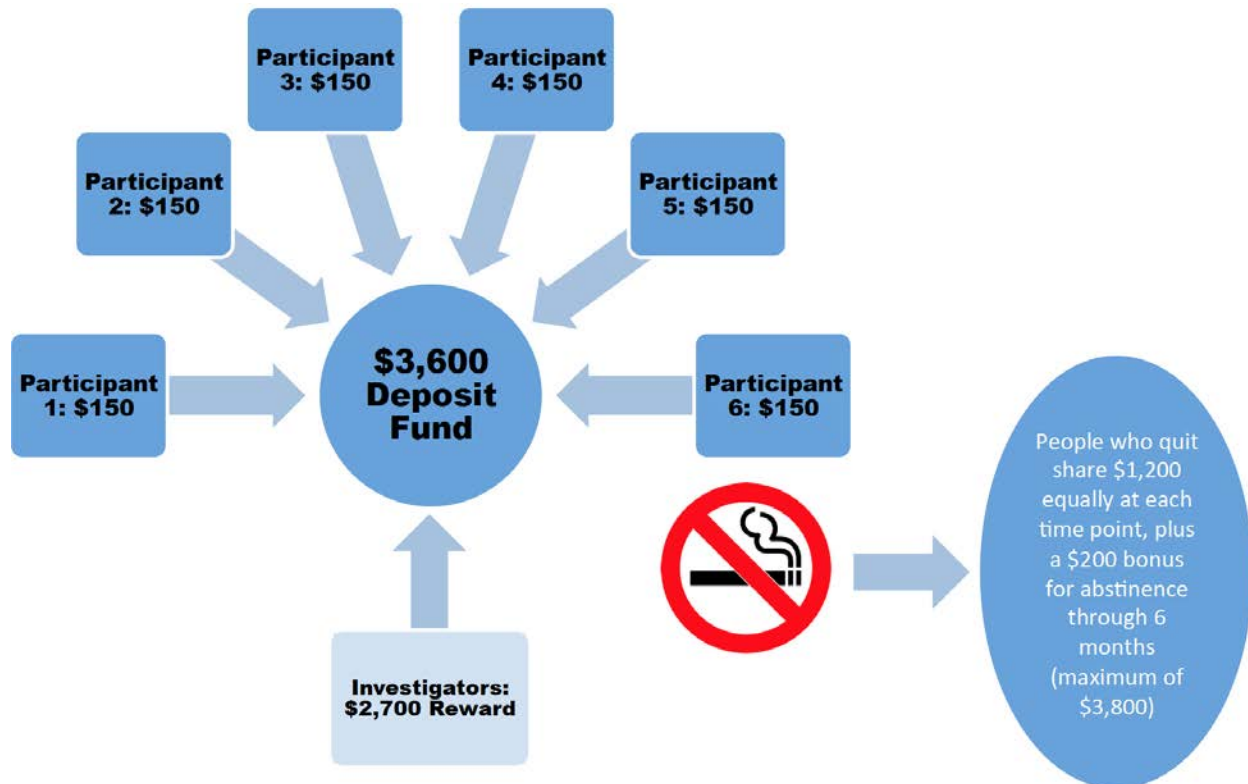

**Figure S3: Costs incurred for each participant achieving sustained abstinence from smoking in the 5 study arms**

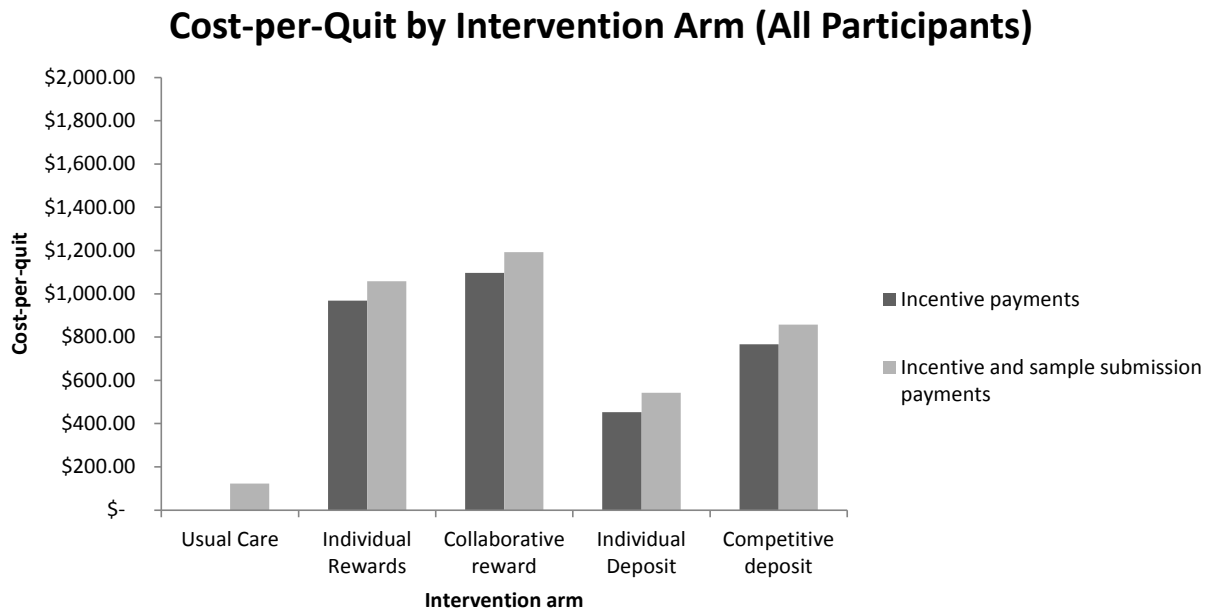

This figure reports the total costs incurred per successful quitter in each arm. These costs reflect the best estimates of the costs that might be incurred by an employer that implemented each of these interventions. Data are reported as the costs of the incentives alone, and as the total costs that would be incurred if an employer required biochemical confirmation of abstinence in the same ways as in this trial. For the latter calculation, the total costs-per-quit were: \$122.14 in usual care, \$1,058.16 in individual rewards, \$1,192.53 in collaborative rewards, \$541.85 in individual deposits, and \$858.01 in competitive deposits. Because the data are presented at the aggregate (arm) level, the p values were not estimated.

**Table S1: Observed incentive payouts to participants in the four incentive arms**

|                                                                                                       | <b>N</b> | <b>Mean</b> | <b>Median</b> | <b>Interquartile<br/>Range</b> | <b>Full Range</b> |
|-------------------------------------------------------------------------------------------------------|----------|-------------|---------------|--------------------------------|-------------------|
| <b><i>All participants achieving abstinence for 6 months</i></b>                                      |          |             |               |                                |                   |
| Individual Reward                                                                                     | 76       | \$800       | \$800         | \$800-800                      | \$0-800           |
| Collaborative Reward                                                                                  | 83       | \$890.36    | \$800         | \$700-1100                     | \$0-1,700         |
| Individual Deposit                                                                                    | 56       | \$557.14    | \$800         | \$0-800                        | \$0-800           |
| Competitive Deposit                                                                                   | 52       | \$839.62    | \$900         | \$630-1100                     | \$0-1,940         |
| <b><i>All participants achieving abstinence for 6 months who accepted their incentive program</i></b> |          |             |               |                                |                   |
| Individual Reward                                                                                     | 76       | \$800       | \$800         | \$800-800                      | \$800             |
| Collaborative Reward                                                                                  | 80       | \$923.75    | \$800         | \$700-1100                     | \$500-1,700       |
| Individual Deposit                                                                                    | 39       | \$800       | \$800         | \$800-800                      | \$800             |
| Competitive Deposit                                                                                   | 39       | \$1,119.49  | \$900         | \$900-1250                     | \$540-1,940       |

**Table S2: Effectiveness of the four incentive programs versus usual care in producing sustained abstinence at 14 days, 30 days, 6 months and 12 months\***

|                                         | <b>N Sustained<br/>abstinence/ N<br/>Randomized</b> | <b>% Sustained<br/>abstinence</b> | <b>95% CI</b> | <b>P-value vs.<br/>usual care</b> |
|-----------------------------------------|-----------------------------------------------------|-----------------------------------|---------------|-----------------------------------|
| <b>14 days</b>                          |                                                     |                                   |               |                                   |
| Usual care                              | 66/468                                              | 14.2%                             | (11.0-17.3)   |                                   |
| Individual rewards                      | 116/498                                             | 23.5%                             | (19.8-27.2)   | < 0.001                           |
| Collaborative rewards                   | 135/519                                             | 26.1%                             | (22.4-29.9)   | < 0.001                           |
| Individual deposits                     | 86/582                                              | 14.5%                             | (11.6-17.3)   | 0.89                              |
| Competitive deposits                    | 74/471                                              | 15.8%                             | (12.5-19.1)   | 0.48                              |
| <b>30 days</b>                          |                                                     |                                   |               |                                   |
| Usual care                              | 49/468                                              | 10.5%                             | (7.7-13.3)    |                                   |
| Individual rewards                      | 100/498                                             | 20.2%                             | (16.7-23.8)   | < 0.001                           |
| Collaborative rewards                   | 117/519                                             | 22.6%                             | (19.1-26.2)   | < 0.001                           |
| Individual deposits                     | 77/582                                              | 12.9%                             | (10.2-15.6)   | 0.23                              |
| Competitive deposits                    | 69/471                                              | 14.8%                             | (11.6-18.0)   | 0.051                             |
| <b>6 months</b>                         |                                                     |                                   |               |                                   |
| Usual care                              | 28/468                                              | 6.0%                              | (3.9-8.2)     |                                   |
| Individual rewards                      | 76/498                                              | 15.4%                             | (12.2-18.5)   | < 0.001                           |
| Collaborative rewards                   | 83/519                                              | 16.0%                             | (12.9-19.2)   | < 0.001                           |
| Individual deposits                     | 56/582                                              | 9.4%                              | (7.1-11.8)    | 0.04                              |
| Competitive deposits                    | 52/471                                              | 11.1%                             | (8.3-14.0)    | 0.006                             |
| <b>12 months<sup>§</sup></b>            |                                                     |                                   |               |                                   |
| Usual care                              | 16/468                                              | 3.4%                              | (1.8-5.1)     |                                   |
| Individual rewards                      | 37/498                                              | 7.5%                              | (5.2-9.8)     | 0.007                             |
| Collaborative rewards                   | 45/519                                              | 8.7%                              | (6.3-11.2)    | 0.001                             |
| Individual deposits                     | 21/582                                              | 3.5%                              | (2.0-5.0)     | 0.94                              |
| Competitive deposits                    | 29/471                                              | 6.2%                              | (4.0-8.4)     | 0.052                             |
| <b>12 months (based on self-report)</b> |                                                     |                                   |               |                                   |
| Usual care                              | 22/468                                              | 4.7%                              | (2.8-6.7)     |                                   |
| Individual rewards                      | 57/498                                              | 11.5%                             | (8.7-14.3)    | < 0.001                           |
| Collaborative rewards                   | 78/519                                              | 15.1%                             | (12.1-18.2)   | < 0.001                           |
| Individual deposits                     | 45/582                                              | 7.6%                              | (5.4-9.7)     | 0.06                              |
| Competitive deposits                    | 40/471                                              | 8.5%                              | (6.0-11.0)    | 0.02                              |

\* Abstinence rates are adjusted for two stratifying variables: whether or not participants received their health insurance through CVS/Caremark, and whether their annual household income was \$60,000 or greater. <sup>§</sup>Relapse rates at 12 months among those achieving abstinence through 6 months were similar in the usual care group (12/28; 43%) and the four intervention groups combined (135/267; 51%) (p = 0.44).



**Table S3: Self-reported versus biochemically verified abstinence at 14 days, 30 days, 6 months and 12 months**

|                                    | <b>Usual Care<br/>N = 468</b> | <b>Individual<br/>Reward<br/>N = 498</b> | <b>Collaborative<br/>Reward<br/>N = 519</b> | <b>Individual<br/>Deposit<br/>N = 582</b> | <b>Competitive<br/>Deposit<br/>N = 471</b> |
|------------------------------------|-------------------------------|------------------------------------------|---------------------------------------------|-------------------------------------------|--------------------------------------------|
| <b>14 days</b>                     |                               |                                          |                                             |                                           |                                            |
| Self-reported quit                 | 112                           | 162                                      | 188                                         | 115                                       | 103                                        |
| Tested negative                    | 65                            | 116                                      | 134                                         | 86                                        | 72                                         |
| <i>% of self reports confirmed</i> | <i>58%</i>                    | <i>72%</i>                               | <i>71%</i>                                  | <i>75%</i>                                | <i>70%</i>                                 |
| <b>30 days</b>                     |                               |                                          |                                             |                                           |                                            |
| Self-reported quit                 | 59                            | 109                                      | 126                                         | 85                                        | 73                                         |
| Tested negative                    | 48                            | 100                                      | 117                                         | 77                                        | 68                                         |
| <i>% of self reports confirmed</i> | <i>81%</i>                    | <i>92%</i>                               | <i>93%</i>                                  | <i>91%</i>                                | <i>93%</i>                                 |
| <b>6 months</b>                    |                               |                                          |                                             |                                           |                                            |
| Self-reported quit                 | 33                            | 90                                       | 100                                         | 66                                        | 61                                         |
| Tested negative                    | 28                            | 76                                       | 83                                          | 56                                        | 52                                         |
| <i>% of self reports confirmed</i> | <i>85%</i>                    | <i>84%</i>                               | <i>83%</i>                                  | <i>85%</i>                                | <i>85%</i>                                 |
| <b>12 months</b>                   |                               |                                          |                                             |                                           |                                            |
| Self-reported quit                 | 22                            | 57                                       | 78                                          | 45                                        | 40                                         |
| Tested negative                    | 16                            | 37                                       | 45                                          | 21                                        | 29                                         |
| <i>% of self reports confirmed</i> | <i>73%</i>                    | <i>65%</i>                               | <i>58%</i>                                  | <i>47%</i>                                | <i>73%</i>                                 |

**Table S4: Effectiveness of reward-based versus deposit-based incentives in producing sustained abstinence at 14 days, 30 days, 6 months and 12 months\***

|                                         | <b>N Sustained<br/>abstinence/ N<br/>Randomized</b> | <b>%<br/>Sustained<br/>abstinence</b> | <b>95% CI</b> | <b>P-value<br/>reward<br/>versus<br/>deposit</b> | <b>P-value<br/>versus<br/>usual<br/>care</b> |
|-----------------------------------------|-----------------------------------------------------|---------------------------------------|---------------|--------------------------------------------------|----------------------------------------------|
| <b>14 days</b>                          |                                                     |                                       |               |                                                  |                                              |
| Reward-based incentives                 | 251/1017                                            | 24.8%                                 | (22.2-27.5)   | < 0.001                                          | < 0.001                                      |
| Deposit-based incentives                | 160/1053                                            | 15.1%                                 | (12.9-17.2)   |                                                  | 0.65                                         |
| <b>30 days</b>                          |                                                     |                                       |               |                                                  |                                              |
| Reward-based incentives                 | 217/1017                                            | 21.5%                                 | (19.0-24.0)   | < 0.001                                          | < 0.001                                      |
| Deposit-based incentives                | 146/1053                                            | 13.7%                                 | (11.7-15.8)   |                                                  | 0.08                                         |
| <b>6 months</b>                         |                                                     |                                       |               |                                                  |                                              |
| Reward-based incentives                 | 159/1017                                            | 15.7%                                 | (13.5-18.0)   | < 0.001                                          | <0.001                                       |
| Deposit-based incentives                | 108/1053                                            | 10.2%                                 | (8.4-12.0)    |                                                  | 0.009                                        |
| <b>12 months</b>                        |                                                     |                                       |               |                                                  |                                              |
| Reward-based incentives                 | 82/1017                                             | 8.1%                                  | (6.4-9.8)     | 0.002                                            | 0.001                                        |
| Deposit-based incentives                | 50/1053                                             | 4.7%                                  | (3.4-6.0)     |                                                  | 0.26                                         |
| <b>12 months (based on self-report)</b> |                                                     |                                       |               |                                                  |                                              |
| Reward-based incentives                 | 135/1017                                            | 13.4%                                 | (11.3-15.5)   | < 0.001                                          | < 0.001                                      |
| Deposit-based incentives                | 85/1053                                             | 8.0%                                  | (6.4-9.6)     |                                                  | 0.023                                        |

\*Abstinence rates are adjusted for two stratifying variables: whether or not participants received their health insurance through CVS/Caremark, and whether their annual household income was \$60,000 or greater.

**Table S5: Effectiveness of individual-based versus group-based incentives in producing sustained abstinence at 14 days, 30 days, 6 months and 12 months\***

|                                         | <b>N Sustained<br/>abstinence/ N<br/>Randomized</b> | <b>%<br/>Sustained<br/>abstinence</b> | <b>95% CI</b> | <b>P-value<br/>group<br/>versus<br/>individual</b> | <b>P-value<br/>versus<br/>usual<br/>care</b> |
|-----------------------------------------|-----------------------------------------------------|---------------------------------------|---------------|----------------------------------------------------|----------------------------------------------|
| <b>14 days</b>                          |                                                     |                                       |               |                                                    |                                              |
| Individual-based incentives             | 202/1080                                            | 18.6%                                 | (16.3-20.9)   | 0.13                                               | 0.034                                        |
| Group-based incentives                  | 209/990                                             | 21.2%                                 | (18.7-23.8)   |                                                    | 0.001                                        |
| <b>30 days</b>                          |                                                     |                                       |               |                                                    |                                              |
| Individual-based incentives             | 177/1080                                            | 16.3%                                 | (14.1-18.5)   | 0.12                                               | 0.003                                        |
| Group-based incentives                  | 186/990                                             | 18.9%                                 | (16.5-21.3)   |                                                    | < 0.001                                      |
| <b>6 months</b>                         |                                                     |                                       |               |                                                    |                                              |
| Individual-based incentives             | 132/1080                                            | 12.1%                                 | (10.2-14.1)   | 0.29                                               | < 0.001                                      |
| Group-based incentives                  | 135/990                                             | 13.7%                                 | (11.6-15.8)   |                                                    | < 0.001                                      |
| <b>12 months</b>                        |                                                     |                                       |               |                                                    |                                              |
| Individual-based incentives             | 58/1080                                             | 5.3%                                  | (4.0-6.7)     | 0.043                                              | 0.11                                         |
| Group-based incentives                  | 74/990                                              | 7.5%                                  | (5.9-9.2)     |                                                    | 0.003                                        |
| <b>12 months (based on self-report)</b> |                                                     |                                       |               |                                                    |                                              |
| Individual-based incentives             | 102/1080                                            | 9.4%                                  | (7.6-11.1)    | 0.055                                              | 0.002                                        |
| Group-based incentives                  | 118/990                                             | 12.0%                                 | (10.0-14.0)   |                                                    | < 0.001                                      |

\*Abstinence rates are adjusted for two stratifying variables: whether or not participants received their health insurance through CVS/Caremark, and whether their annual household income was \$60,000 or greater.

**Table S6: Proportions of participants achieving sustained abstinence through 6 months by intervention arm and randomization stratum**

|                                                 | <b>Usual Care</b><br><i>n=468</i> | <b>Individual<br/>Reward</b><br><i>n=498</i> | <b>Collaborative<br/>Reward</b><br><i>n=519</i> | <b>Individual<br/>Deposit</b><br><i>n=582</i> | <b>Competitive<br/>Deposit</b><br><i>n=471</i> |
|-------------------------------------------------|-----------------------------------|----------------------------------------------|-------------------------------------------------|-----------------------------------------------|------------------------------------------------|
| Randomization stratum – no. (%)                 |                                   |                                              |                                                 |                                               |                                                |
| High income ( $\geq$ \$60,000) without benefits | 5/70 (7.1)                        | 13/69 (18.8)                                 | 14/82 (17.1)                                    | 11/96 (11.5)                                  | 10/51 (19.6)                                   |
| High income with benefits                       | 2/52 (3.8)                        | 10/54 (18.5)                                 | 14/55 (25.5)                                    | 12/83 (14.5)                                  | 11/62 (17.7)                                   |
| Low income without benefits                     | 17/210 (8.1)                      | 29/222 (13.1)                                | 31/234 (13.2)                                   | 17/244 (7.0)                                  | 17/216 (7.9)                                   |
| Low income with benefits                        | 4/136 (2.9)                       | 24/153 (15.7)                                | 24/148 (16.2)                                   | 16/159 (10.1)                                 | 14/142 (9.9)                                   |
| 6 month sustained abstinence total*             | 28/468 (6.0)                      | 76/498 (15.4)                                | 83/519 (16.0)                                   | 56/582 (9.4)                                  | 52/471 (11.1)                                  |

\*The overall 6 month sustained abstinence rates are adjusted for two stratifying variables: whether or not participants received their health insurance through CVS/Caremark, and whether their annual household income was \$60,000 or greater.

**Table S7: Efficacy of reward-based and deposit-based incentives conditional on acceptance of the assigned intervention (i.e., per-protocol analysis)\***

|                                         | <b>N Sustained<br/>abstinence/ N<br/>Randomized</b> | <b>%<br/>Sustained<br/>abstinence</b> | <b>95% CI</b> | <b>P-value<br/>reward<br/>versus<br/>deposit</b> | <b>P-value<br/>versus<br/>usual<br/>care</b> |
|-----------------------------------------|-----------------------------------------------------|---------------------------------------|---------------|--------------------------------------------------|----------------------------------------------|
| <b>14 days</b>                          |                                                     |                                       |               | < 0.001                                          |                                              |
| Reward-based incentives                 | 245/914                                             | 26.9%                                 | (24.1-29.8)   |                                                  | < 0.001                                      |
| Deposit-based incentives                | 108/146                                             | 72.4%                                 | (64.9-79.9)   |                                                  | < 0.001                                      |
| <b>30 days</b>                          |                                                     |                                       |               | < 0.001                                          |                                              |
| Reward-based incentives                 | 212/914                                             | 23.3%                                 | (20.5-26.0)   |                                                  | < 0.001                                      |
| Deposit-based incentives                | 102/146                                             | 68.2%                                 | (60.4-76.0)   |                                                  | < 0.001                                      |
| <b>6 months</b>                         |                                                     |                                       |               | < 0.001                                          |                                              |
| Reward-based incentives                 | 156/914                                             | 17.1%                                 | (14.7-19.6)   |                                                  | < 0.001                                      |
| Deposit-based incentives                | 78/146                                              | 52.3%                                 | (44.0-60.6)   |                                                  | < 0.001                                      |
| <b>12 months</b>                        |                                                     |                                       |               | 0.002                                            |                                              |
| Reward-based incentives                 | 80/914                                              | 8.8%                                  | (7.0-10.6)    |                                                  | < 0.001                                      |
| Deposit-based incentives                | 27/146                                              | 17.2%                                 | (11.1-23.3)   |                                                  | < 0.001                                      |
| <b>12 months (based on self-report)</b> |                                                     |                                       |               | < 0.001                                          |                                              |
| Reward-based incentives                 | 132/914                                             | 14.5%                                 | (12.2-16.8)   |                                                  | < 0.001                                      |
| Deposit-based incentives                | 56/146                                              | 36.5%                                 | (28.6-44.4)   |                                                  | < 0.001                                      |

\*Abstinence rates are adjusted for two stratifying variables: whether or not participants received their health insurance through CVS/Caremark, and whether their annual household income was \$60,000 or greater.

**Table S8: Results of screening for smoking status at trial enrollment across arms**

| Arm                  | Selected for screen |     | Noncompliant |     | Negative* |    | Positive* |      | Negative and Noncompliant |     |
|----------------------|---------------------|-----|--------------|-----|-----------|----|-----------|------|---------------------------|-----|
|                      | N                   | %   | N            | %   | N         | %  | N         | %    | N                         | %   |
| Usual Care           | 47                  | 31% | 10           | 21% | 2         | 4% | 35        | 74%  | 12                        | 26% |
| Individual Reward    | 48                  | 32% | 4            | 8%  | 4         | 8% | 40        | 83%  | 8                         | 17% |
| Collaborative Reward | 47                  | 31% | 6            | 13% | 3         | 6% | 38        | 81%  | 9                         | 19% |
| Individual Deposit   | 4                   | 3%  | 1            | 25% | 0         | 0% | 3         | 75%  | 1                         | 25% |
| Competitive Deposit  | 4                   | 3%  | 0            | 0%  | 0         | 0% | 4         | 100% | 0                         | 0%  |

\*Negative and positive refer to the results of submitted cotinine assays, such that negative tests indicated likely non-smokers, and positive tests confirmed active smoking status. Fewer participants were selected for screening in the deposit contract arms because we aimed to screen a 5% random sample of participants who accepted their assigned intervention, and fewer participants accepted deposit contracts.

**Table S9: Sensitivity analysis of sustained abstinence at 6 months to account for potential enrollment of non-smokers**

| Scenario              | Observed                             |                                 |                    | Assuming 6% of successful participants were ineligible |                        |                    | Assuming 20% of successful participants were ineligible |                        |                    |
|-----------------------|--------------------------------------|---------------------------------|--------------------|--------------------------------------------------------|------------------------|--------------------|---------------------------------------------------------|------------------------|--------------------|
|                       | N Sustained abstinence/ N Randomized | % Sustained abstinence (95% CI) | P-value vs. UC arm | N Sustained abstinence/ N Randomized                   | % Sustained abstinence | P-value vs. UC arm | N Sustained abstinence/ N Randomized                    | % Sustained abstinence | P-value vs. UC arm |
| <b>Arm</b>            |                                      |                                 |                    |                                                        |                        |                    |                                                         |                        |                    |
| Usual Care            | 28/468                               | 6.0%<br>(3.9-8.2)               | --                 | 26 / 466                                               | 5.6%                   | --                 | 22 / 462                                                | 4.8%                   | --                 |
| Individual Rewards    | 76/498                               | 15.4%<br>(12.2-18.5)            | < 0.001            | 71 / 493                                               | 14.4%                  | < 0.001            | 61 / 483                                                | 12.6%                  | < 0.001            |
| Collaborative Rewards | 83/519                               | 16.0%<br>(12.9-19.2)            | < 0.001            | 78 / 514                                               | 15.2%                  | < 0.001            | 66 / 502                                                | 13.1%                  | < 0.001            |
| Individual Deposits   | 56/582                               | 9.4%<br>(7.1-11.8)              | 0.041              | 53 / 579                                               | 9.2%                   | 0.029              | 45 / 571                                                | 7.9%                   | 0.043              |
| Competitive Deposits  | 52/471                               | 11.1%<br>(8.3-14.0)             | 0.006              | 49 / 468                                               | 10.5%                  | 0.006              | 42 / 461                                                | 9.1%                   | 0.009              |

We screened a random sample of 5% of enrolled participants to ensure that they were truly smokers at the time of enrollment (n = 150). These participants were offered \$100 to complete a cotinine sample to confirm smoking status. Of the 150 participants eligible for screening, 129 (86%) returned samples. Of the samples returned, 9 (7% of the 129 who returned samples, and 6% of the 150 who were selected for screening) were negative for cotinine, suggesting that these participants were non-smokers (although these could also represent false-negative assays). If we assume that all 9 participants who returned samples negative for cotinine were truly non-smokers, then the proportion of participants in the trial who enrolled despite being non-smokers (and were hence ineligible) would be 6%. Assuming that all participants in this 6% would have been classified as having successfully quit (i.e., they did not newly begin smoking during the incentives trial), we deduct 6% from the numerator of each quit rate in the first sensitivity analysis, and deduct the same number of participants from the denominator (because these individuals would have been ineligible). The second sensitivity analysis uses the

same approach, but uses the more conservative assumption that both the 9 (6%) with negative assays, and the 21 (14%) who did not return samples (total = 30/150, 20%) were all non-smokers. All comparisons of the interventions' quit rates to usual care were performed using the intention-to-treat approach.



**Table S10: Self-reported abstinence and verified abstinence rates at 14 days, 30 days, 6 months and 12 months across participants as assigned (ITT)**

|                                     | Usual Care<br>N = 468 | Individual<br>Reward<br>N = 498 | Collaborative<br>Reward<br>N = 519 | Individual<br>Deposit<br>N = 582 | Competitive<br>Deposit<br>N = 471 | All arms<br>N = 2538 |
|-------------------------------------|-----------------------|---------------------------------|------------------------------------|----------------------------------|-----------------------------------|----------------------|
| <b>Self-report Quit on 14-day</b>   | 112                   | 162                             | 188                                | 115                              | 103                               | 680                  |
| <b>% Total</b>                      | 24%                   | 33%                             | 36%                                | 20%                              | 22%                               | 27%                  |
| <b>Tested Negative on 14-day</b>    | 65                    | 116                             | 134                                | 86                               | 72                                | 473                  |
| <b>% Total</b>                      | 14%                   | 23%                             | 26%                                | 15%                              | 15%                               | 19%                  |
| <br>                                |                       |                                 |                                    |                                  |                                   |                      |
| <b>Self-report Quit on 30-day</b>   | 59                    | 109                             | 126                                | 85                               | 73                                | 452                  |
| <b>% Total</b>                      | 13%                   | 22%                             | 24%                                | 15%                              | 15%                               | 18%                  |
| <b>Tested Negative on 30-day</b>    | 48                    | 100                             | 117                                | 77                               | 68                                | 410                  |
| <b>% Total</b>                      | 10%                   | 20%                             | 23%                                | 13%                              | 14%                               | 16%                  |
| <br>                                |                       |                                 |                                    |                                  |                                   |                      |
| <b>Self-report Quit on 6-month</b>  | 33                    | 90                              | 100                                | 66                               | 61                                | 350                  |
| <b>% Total</b>                      | 7%                    | 18%                             | 19%                                | 11%                              | 13%                               | 14%                  |
| <b>Tested Negative on 6-month</b>   | 28                    | 76                              | 83                                 | 56                               | 52                                | 295                  |
| <b>% Total</b>                      | 6%                    | 15%                             | 16%                                | 10%                              | 11%                               | 12%                  |
| <br>                                |                       |                                 |                                    |                                  |                                   |                      |
| <b>Self-report Quit on 12-month</b> | 22                    | 57                              | 78                                 | 45                               | 40                                | 242                  |
| <b>% Total</b>                      | 5%                    | 11%                             | 15%                                | 8%                               | 8%                                | 10%                  |
| <b>Tested Negative on 12-month</b>  | 16                    | 37                              | 45                                 | 21                               | 29                                | 148                  |
| <b>% Total</b>                      | 3%                    | 7%                              | 9%                                 | 4%                               | 6%                                | 6%                   |
